# Supplementary material
Source: PubMed Central journal article supplement (PMC5734895)
Supplement: jcsm.14.1.65s1.pdf [file jcsm.14.1.65s1.pdf]

Figure S1: MSLT Repeatability for NT1 and NT2 on Medication(s)

**NT1 on medication(s) (n=20)**

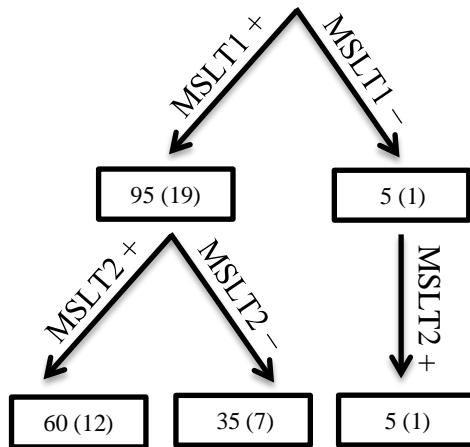

**NT2 on medication(s) (n=15)**

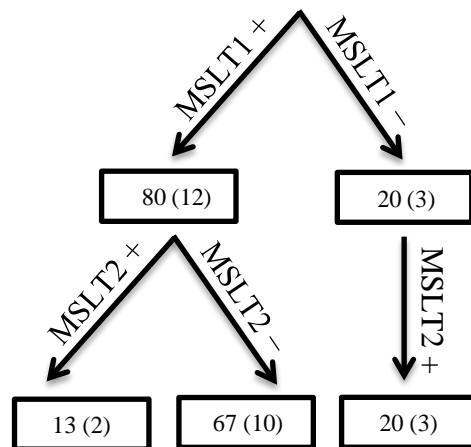

| MSLT1 Diagnosis or Medication(s) | MSLT2 Diagnosis or Medication(s) | n= |
|----------------------------------|----------------------------------|----|
| <b>Narcolepsy</b>                | <b>Narcolepsy</b>                |    |
| No meds                          | AD, Stim, SO                     | 4  |
| No meds                          | AD, Stim                         | 1  |
| No meds                          | AD, SO                           | 1  |
| No meds                          | SO                               | 6  |
| <b>Narcolepsy</b>                | <b>Negative</b>                  |    |
| No meds                          | SO                               | 2  |
| <b>Narcolepsy</b>                | <b>IH</b>                        |    |
| No meds                          | AD, Stim, SO                     | 1  |
| No meds                          | AD                               | 2  |
| No meds                          | SO                               | 2  |
| <b>Negative</b>                  | <b>Narcolepsy</b>                |    |
| AD                               | AD                               | 1  |
|                                  | Total n=                         | 20 |

| MSLT1 Diagnosis or Medication(s) | MSLT2 Diagnosis or Medication(s) | n= |
|----------------------------------|----------------------------------|----|
| <b>Narcolepsy</b>                | <b>Narcolepsy</b>                |    |
| Stim                             | No meds                          | 1  |
| No meds                          | AD                               | 1  |
| <b>Narcolepsy</b>                | <b>Negative</b>                  |    |
| No meds                          | AD                               | 2  |
| No meds                          | AD, Stim                         | 1  |
| No meds                          | AD, Stim, SO                     | 1  |
| Stim                             | No meds                          | 1  |
| AD                               | AD                               | 1  |
| SO                               | SO                               | 1  |
| AD                               | AD, Stim                         | 1  |
| No meds                          | AD                               | 1  |
| <b>Narcolepsy</b>                | <b>IH</b>                        |    |
| AD                               | AD                               | 1  |
| <b>Negative</b>                  | <b>Narcolepsy</b>                |    |
| No meds                          | AD                               | 1  |
| No meds                          | Stim, SO                         | 1  |
| AD                               | AD                               | 1  |
|                                  | Total n =                        | 15 |

Figure S1: A. MSLT Repeatability for NT1 and NT2 on medication(s), including stimulant(s), antidepressant, and/or sodium oxybate, at either MSLT1 and/or MSLT2. MSLT1 and MSLT2 refer to the first and second MSLT, respectively. Each positive and negative sign denotes whether the MSLT was positive or negative for narcolepsy criteria (MSL $\leq$ 8 min,  $\geq$ 2SOREMPs based on ICSD3), respectively. In the lower half of the figure the breakdown of which medication(s) NT1 and NT2 subjects were taking at the time of MSLT1 and MSLT2. In the lower half of the figure a negative MSLT is further divided up into IH (i.e., MSL $\leq$ 8 min, <2SOREMPs) versus a negative MSLT (i.e., MSL>8 min). Data are % (n) (of total population) unless otherwise specified. No meds: no sleep-related medications were being taken at time of MSLT for at least two weeks. AD: Antidepressant being taken at time of PSG/MSLT; Stim: Stimulant or wake promoting medication being taken at time of PSG/MSLT; SO: Sodium oxybate being taken at time of PSG/MSLT.

Figure S2: MSLT Repeatability for NT1 and NT2: Adults versus Children

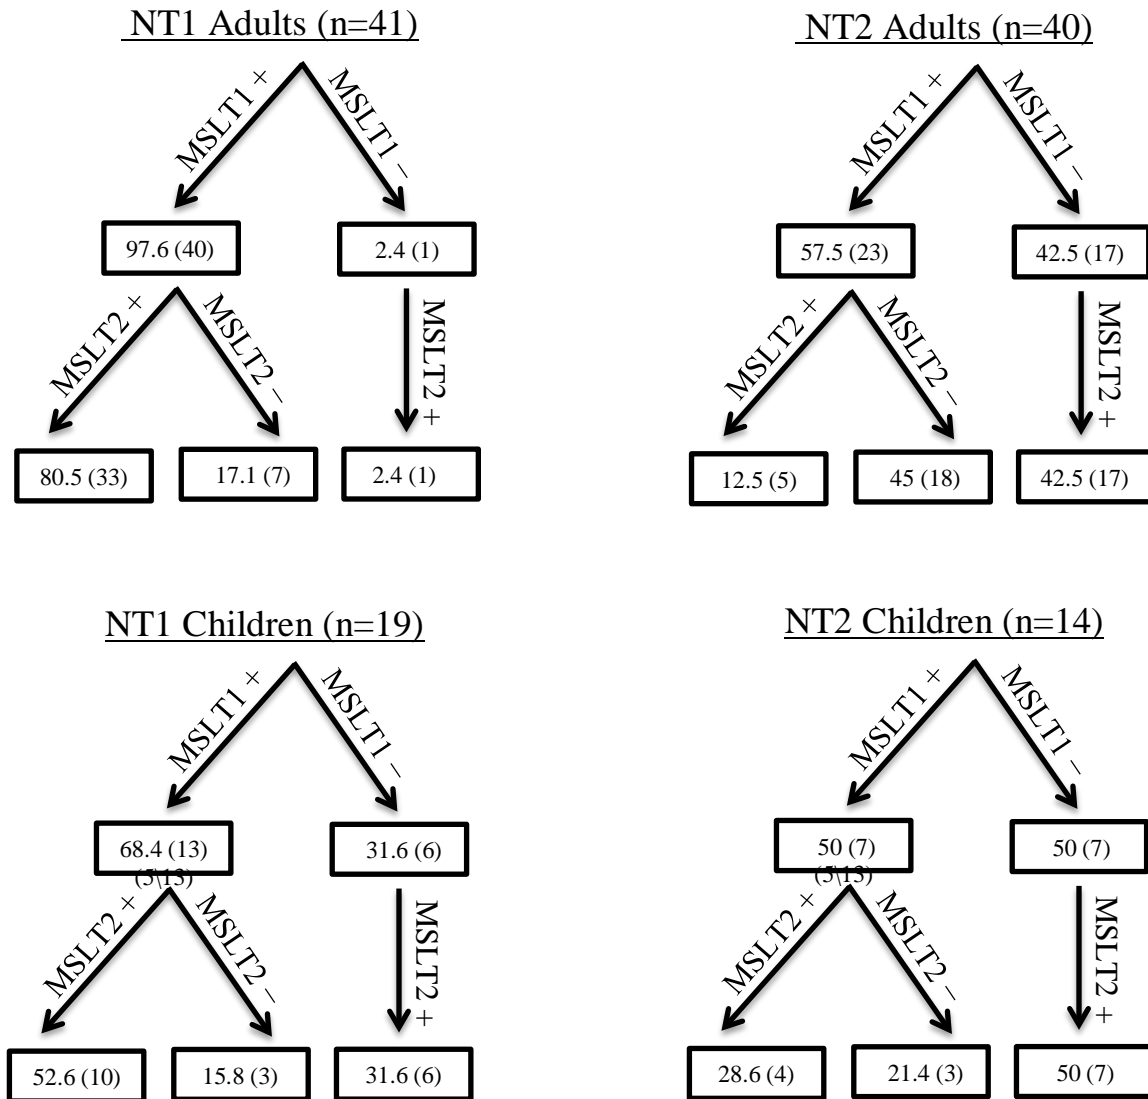

Figure S2: MSLT repeatability in NT1 and NT2 by adults versus children. MSLT1 and MSLT2 refer to the first and second MSLT, respectively. Each positive and negative sign denotes whether the MSLT was positive or negative for narcolepsy criteria ( $MSL \leq 8$  min,  $\geq 2$  SOREMPs based on ICSD3), respectively. Data are % (n) (of total population). Adult:  $\geq 18$  years of age at time of first MSLT; children:  $< 18$  years of age at time of first MSLT.
